# Supplementary material
Source: publisher figshare collection journal article supplement (https://tandf.figshare.com/ndownloader/files/34092472)
Supplement: Supplementary file 1 [file 34092472]

| **Online table 1. Distribution of educational and income categories in 1996, 2006 and 2016, by sex and age group** | | | | |
| --- | --- | --- | --- | --- |
|  | | Women | Men | All |
|
| *Highest achieved educational level* |  |  |  |  |
| Compulsory | 1996 | 23.4% | 22.9% | 23.2% |
|  | 2006 | 13.5% | 16.1% | 14.8% |
|  | 2016 | 7.7% | 9.7% | 8.6% |
|  | p* | **<0.001** | **<0.001** | **<0.001** |
| Upper secondary | 1996 | 61.7% | 56.5% | 59.2% |
|  | 2006 | 57.6% | 64.5% | 61.0% |
|  | 2016 | 53.9% | 65.9% | 59.5% |
|  | p* | **<0.001** | **<0.001** | 0.628 |
| Tertiary | 1996 | 14.9% | 20.6% | 17.7% |
|  | 2006 | 28.8% | 19.4% | 24.2% |
|  | 2016 | 38.4% | 24.4% | 31.8% |
|  | p* | **<0.001** | **0.001** | **<0.001** |
| *Income categories*** |  |  |  |  |
| Low | 1996 | 17.6% | 22.5% | 20.0% |
|  | 2006 | 23.4% | 16.5% | 20.0% |
|  | 2016 | 21.2% | 18.7% | 20.0% |
|  | p* | **<0.001** | **<0.001** |  |
| Medium | 1996 | 60.2% | 59.8% | 60.0% |
|  | 2006 | 58.9% | 61.1% | 60.0% |
|  | 2016 | 62.0% | 57.7% | 60.0% |
|  | p* | 0.170 | 0.140 |  |
| High | 1996 | 22.2% | 17.7% | 20.0% |
|  | 2006 | 17.7% | 22.4% | 20.0% |
|  | 2016 | 16.8% | 23.6% | 20.0% |
|  | p* | **<0.001** | **<0.001** |  |
| Significant results in bold | | | | |
| *Manzel-Haenszel-test for trend | | | | |
| **Divided by quintiles with the middle three summed into medium | | | | |

| **Online table 2. Relative index of inequality (RII) based on education and income in the total study sample and by sex in 1996, 2006 and 2016** | | | | | | | | | | | | | | | | | | | |
| --- | --- | --- | --- | --- | --- | --- | --- | --- | --- | --- | --- | --- | --- | --- | --- | --- | --- | --- | --- |
|  | | **Education** | | | | | | | | | | | | | | | | | |
| Women | | | | | | Men | | | | | | All | | | | | |
|  |  | RII | (95%CI) | | | | | RII | (95%CI) | | | | | RII | (95%CI) | | | | |
| Current asthma | 1996 | 1.44 | ( | 0.89 | - | 2.34 | ) | 1.19 | ( | 0.76 | - | 1.87 | ) | 1.29 | ( | 0.93 | - | 1.80 | ) |
|  | 2006 | 1.24 | ( | 0.80 | - | 1.92 | ) | 1.29 | ( | 0.76 | - | 2.18 | ) | 1.20 | ( | 0.86 | - | 1.68 | ) |
|  | 2016 | 1.20 | ( | 0.78 | - | 1.85 | ) | 1.01 | ( | 0.58 | - | 1.77 | ) | 1.04 | ( | 0.74 | - | 1.46 | ) |
| Asthmatic wheeze | 1996 | **3.40** | ( | **2.08** | - | **5.55** | ) | **1.87** | ( | **1.16** | - | **3.01** | ) | **2.51** | ( | **1.78** | - | **3.54** | ) |
|  | 2006 | 1.40 | ( | 0.84 | - | 2.35 | ) | **2.07** | ( | **1.15** | - | **3.72** | ) | **1.64** | ( | **1.12** | - | **2.41** | ) |
|  | 2016 | 1.38 | ( | 0.82 | - | 2.34 | ) | **2.18** | ( | **1.09** | - | **4.35** | ) | **1.54** | ( | **1.02** | - | **2.32** | ) |
| Productive cough | 1996 | **2.42** | ( | **1.55** | - | **3.79** | ) | **2.27** | ( | **1.46** | - | **3.53** | ) | **2.35** | ( | **1.72** | - | **3.22** | ) |
|  | 2006 | **2.64** | ( | **1.55** | - | **4.48** | ) | **2.18** | ( | **1.28** | - | **3.74** | ) | **2.46** | ( | **1.69** | - | **3.59** | ) |
|  | 2016 | **2.16** | ( | **1.25** | - | **3.73** | ) | **3.29** | ( | **1.71** | - | **6.30** | ) | **2.57** | ( | **1.70** | - | **3.89** | ) |
|  |  | **Income** | | | | | | | | | | | | | | | | | |
|  |  | Women | | | | | | Men | | | | | | All | | | | | |
|  |  | RII | (95%CI) | | | | | RII | (95%CI) | | | | | RII | (95%CI) | | | | |
| Current asthma | 1996 | 2.42 | ( | 0.87 | - | 6.71 | ) | **6.44** | ( | **1.89** | - | **21.96** | ) | **3.73** | ( | **1.71** | - | **8.15** | ) |
|  | 2006 | 1.76 | ( | 0.63 | - | 4.93 | ) | 0.84 | ( | 0.31 | - | 2.26 | ) | 1.28 | ( | 0.63 | - | 2.61 | ) |
|  | 2016 | 1.92 | ( | 0.67 | - | 5.46 | ) | 1.67 | ( | 0.57 | - | 4.91 | ) | 1.97 | ( | 0.93 | - | 4.17 | ) |
| Asthmatic wheeze | 1996 | 1.85 | ( | 0.68 | - | 5.03 | ) | 1.93 | ( | 0.61 | - | 6.17 | ) | 1.85 | ( | 0.87 | - | 3.95 | ) |
|  | 2006 | 1.01 | ( | 0.32 | - | 3.22 | ) | 1.42 | ( | 0.46 | - | 4.40 | ) | 1.22 | ( | 0.55 | - | 2.74 | ) |
|  | 2016 | 3.72 | ( | 0.96 | - | 14.51 | ) | 2.55 | ( | 0.68 | - | 9.58 | ) | **3.28** | ( | **1.28** | - | **8.43** | ) |
| Productive cough | 1996 | **4.24** | ( | **1.60** | - | **11.25** | ) | 0.89 | ( | 0.33 | - | 2.41 | ) | **2.03** | ( | **1.01** | - | **4.08** | ) |
|  | 2006 | 2.45 | ( | 0.69 | - | 8.70 | ) | 1.93 | ( | 0.67 | - | 5.58 | ) | 2.03 | ( | 0.90 | - | 4.58 | ) |
|  | 2016 | 1.88 | ( | 0.51 | - | 6.99 | ) | 0.80 | ( | 0.26 | - | 2.41 | ) | 1.13 | ( | 0.49 | - | 2.61 | ) |
| Significant results in bold. Analysed by logistic regression. | | | | | | | | | | | | | | | | | | | |
